# Supplementary material
Source: PubMed Central journal article supplement (PMC7285796)
Supplement: NIHMS1578657-supplement-1.pdf [file NIHMS1578657-supplement-1.pdf]

## **Supplemental Information**

# **Transcriptional and Spatial Resolution of Cell Types in the Mammalian Habenula**

**Yoshiko Hashikawa, Koichi Hashikawa, Mark A. Rossi, Marcus L. Basiri, Yuejia Liu,  
Nathan L. Johnston, Omar R. Ahmad, Garret D. Stuber**

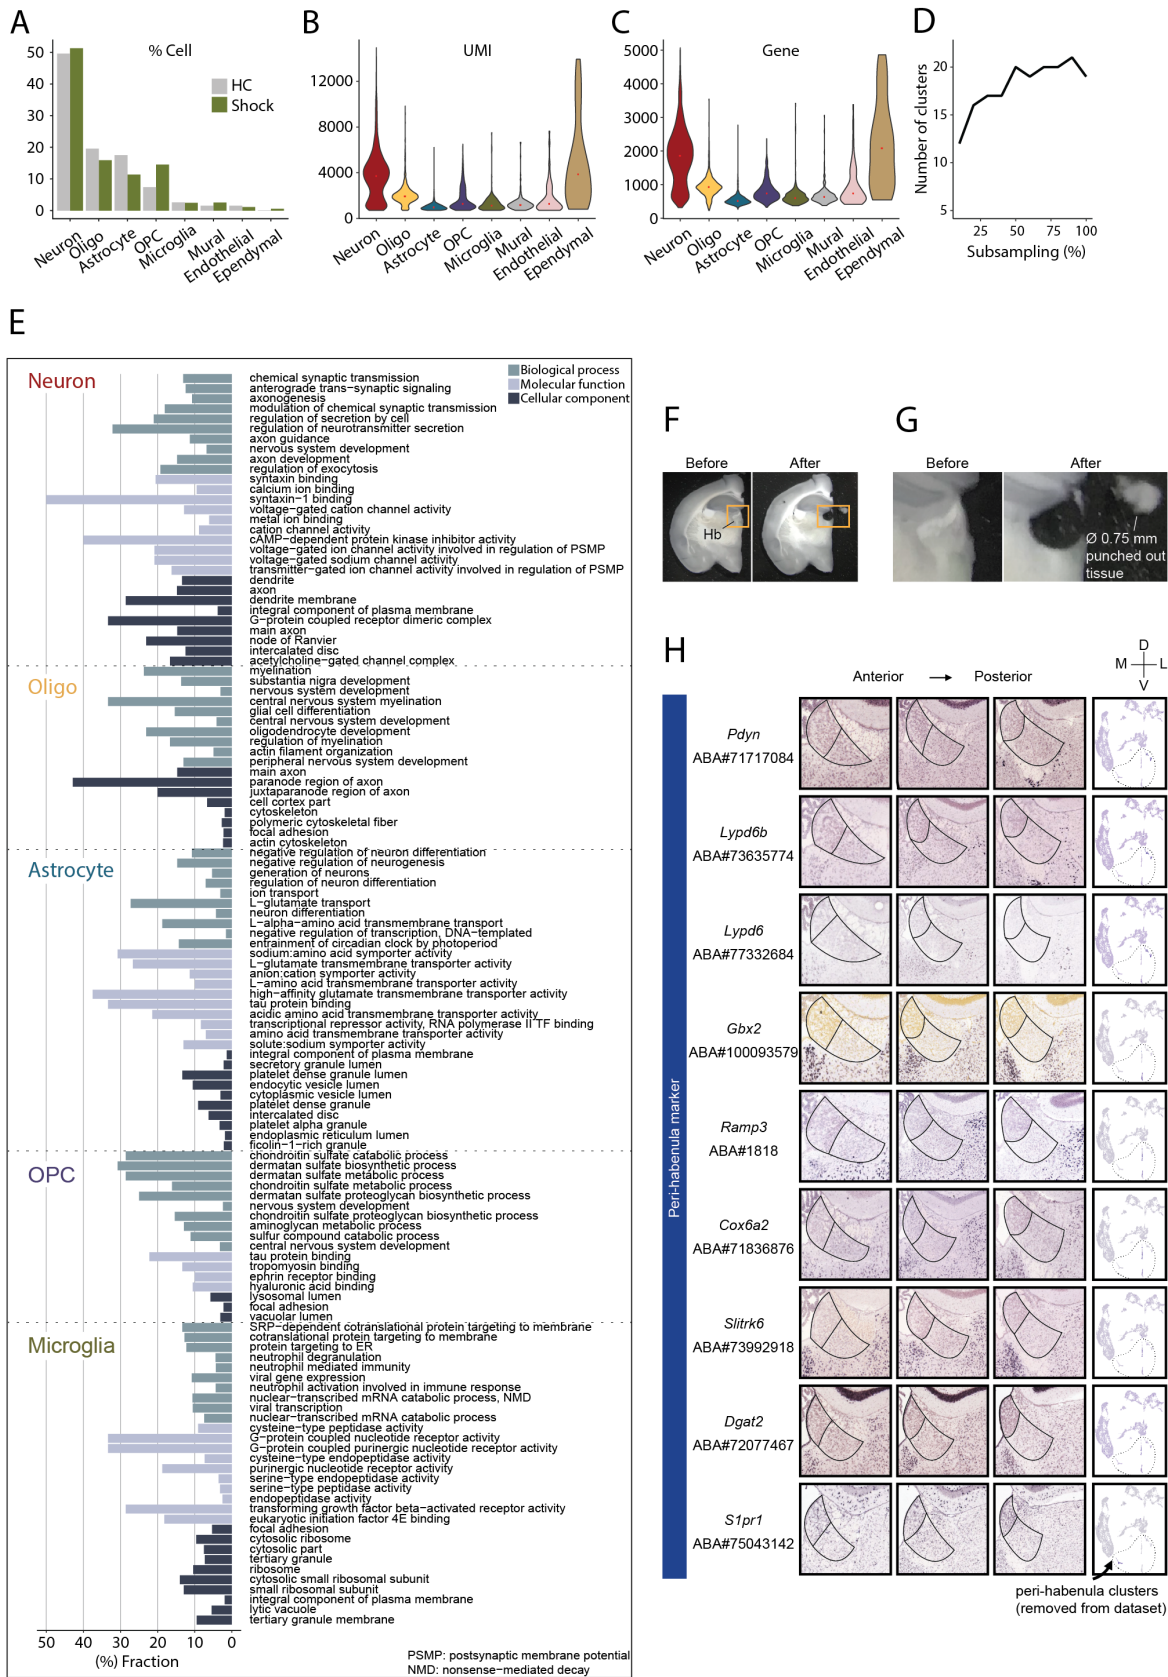

**Figure S1. Additional information for scRNAseq experiments, related to Figure 1. A.** Percentage of cells in each cell type from home cage (HC) or shock groups. **B and C.** Violin plot showing the UMI (**B**) and gene (**C**) distributions in each cell type. **D.** The number of clusters of sub-sampled habenula cells. **E.** Enriched gene ontology terms and fractions of all genes belonging to each term for major cell types. Only terms with adjusted  $p < 0.1$  were shown. GO Biological Process 2018, GO Molecular Function 2018, and GO Cellular Component 2018 were referenced. **F, G.** Representative images showing tissue punching of the habenula. **H.** Representative images from the Allen Brain Atlas (left 3 images) showing the expressions of peri-habenular marker genes and their expression levels in the UMAP (most right images). Based on the expressions of the peri-habenular markers, peri-habenula clusters (dotted line) were removed from downstream analysis.

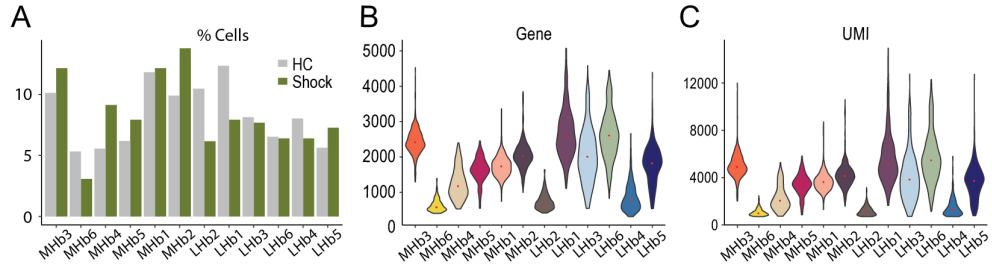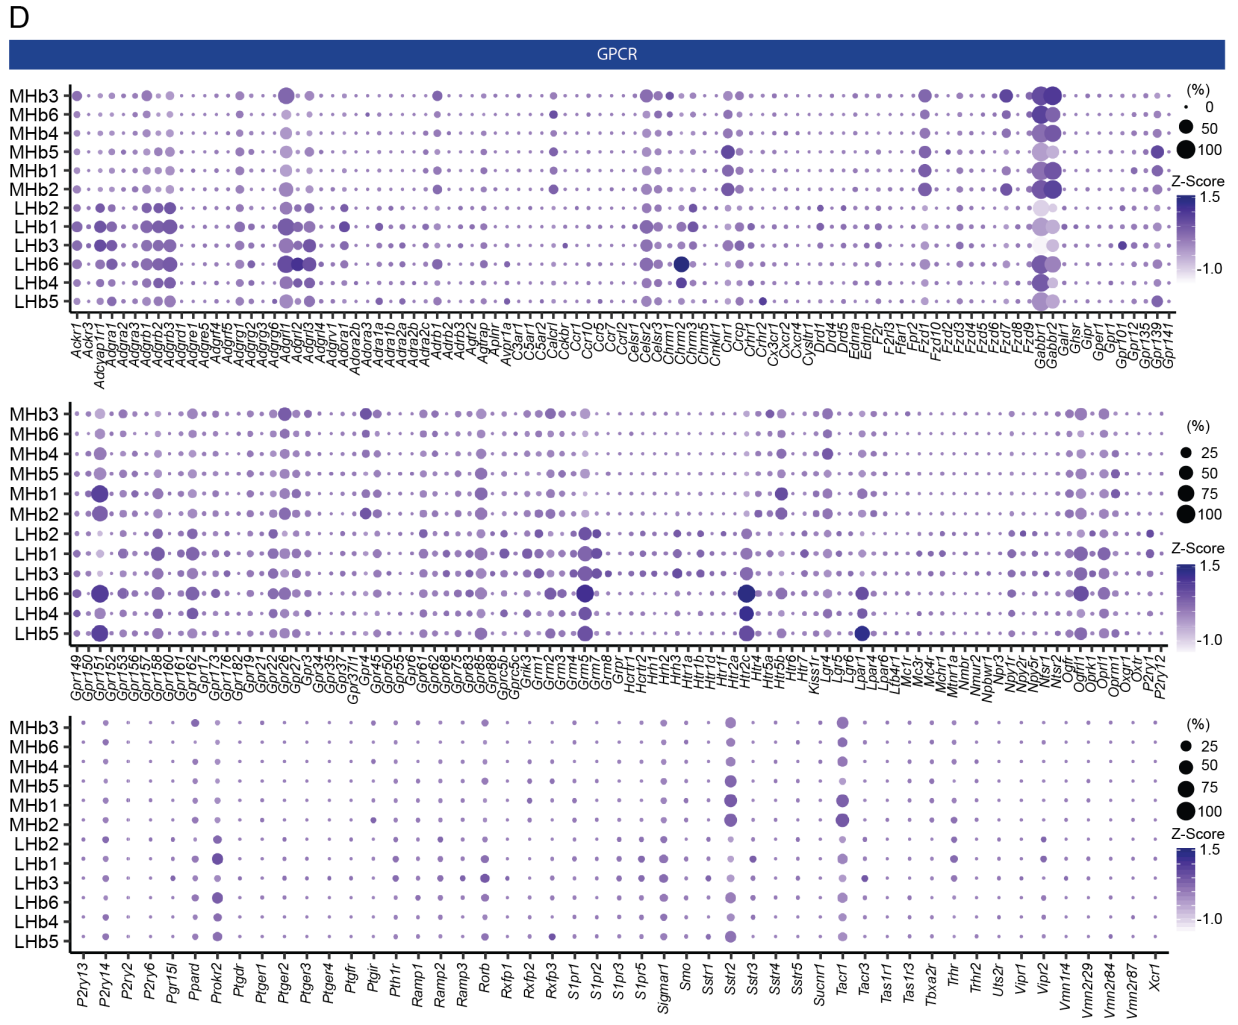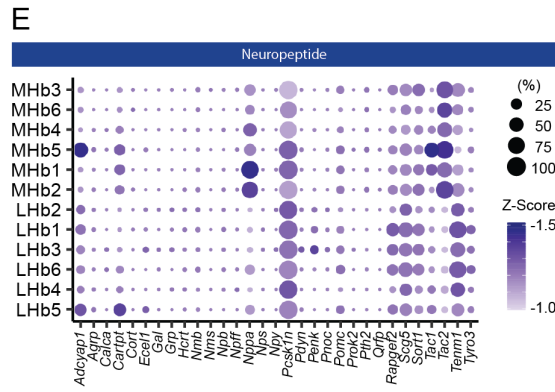

**Figure S2. Additional information for scRNAseq experiments on neuronal cells, related to Figure 2. A.** Percentage of cells in each cell type from home cage (HC) or shock groups. **B and C.** Violin plot showing the gene (**B**) and UMI (**C**) distributions in each cell type. **D, E.** Dot plot illustrating scaled expression levels (color) and the proportions of expressing cells (dot size) of GPCR (**D**) and neuropeptide (**E**) in each cluster.

A

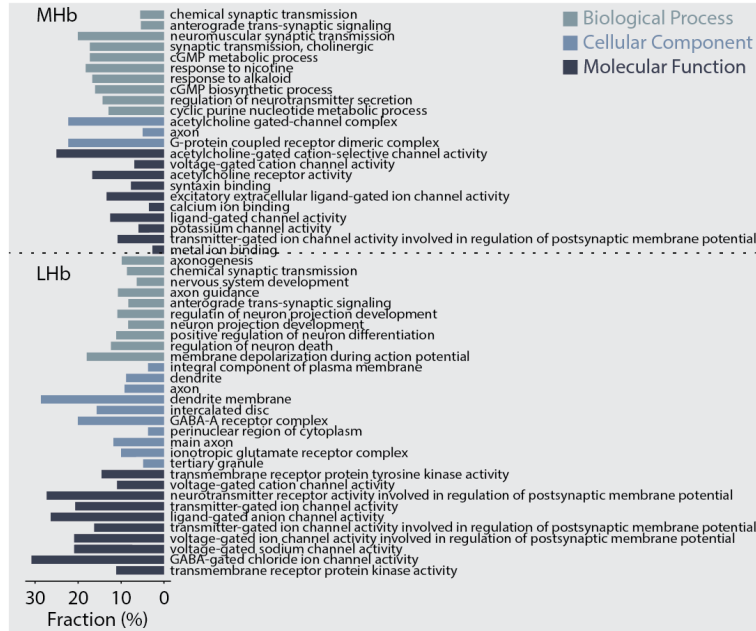

B

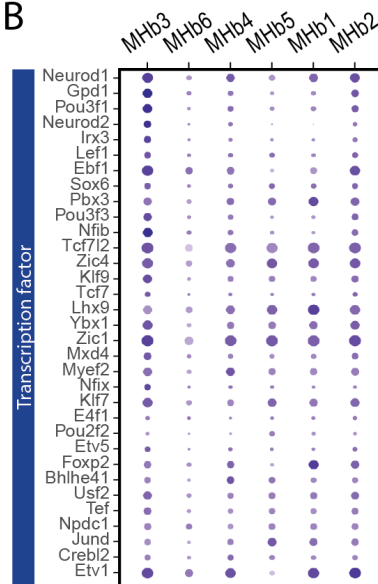

C

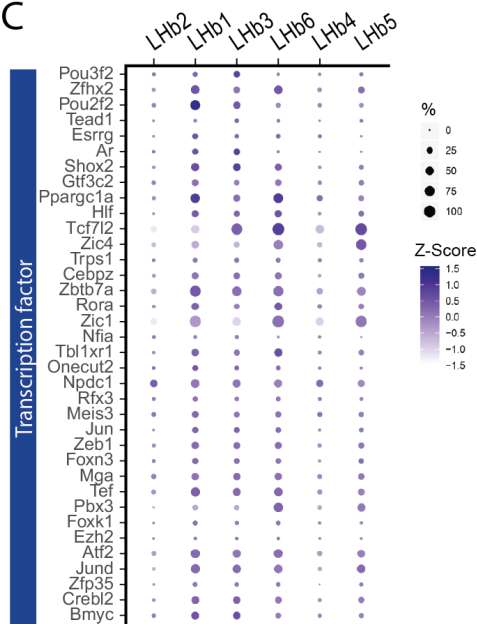

**Figure S3. Additional information for scRNAseq experiments on neuronal cells, related to Figure 3. A.** Enriched gene ontology terms and fractions of all genes belonging to each term in the MHb and Lhb. Only terms with adjusted  $p < 0.1$  were shown. GO Biological Process 2018, GO Molecular Function 2018, and GO Cellular Component 2018 were referenced. **B and C.** Dot plot illustrating scaled expression levels (color) and the proportions of expressing cells (dot size) of transcription factors in MHb (**B**) and Lhb (**C**) clusters. 33 (MHb) and 36 (Lhb) TFs, top selective TFs regulating  $>80\%$  of marker genes, were shown.

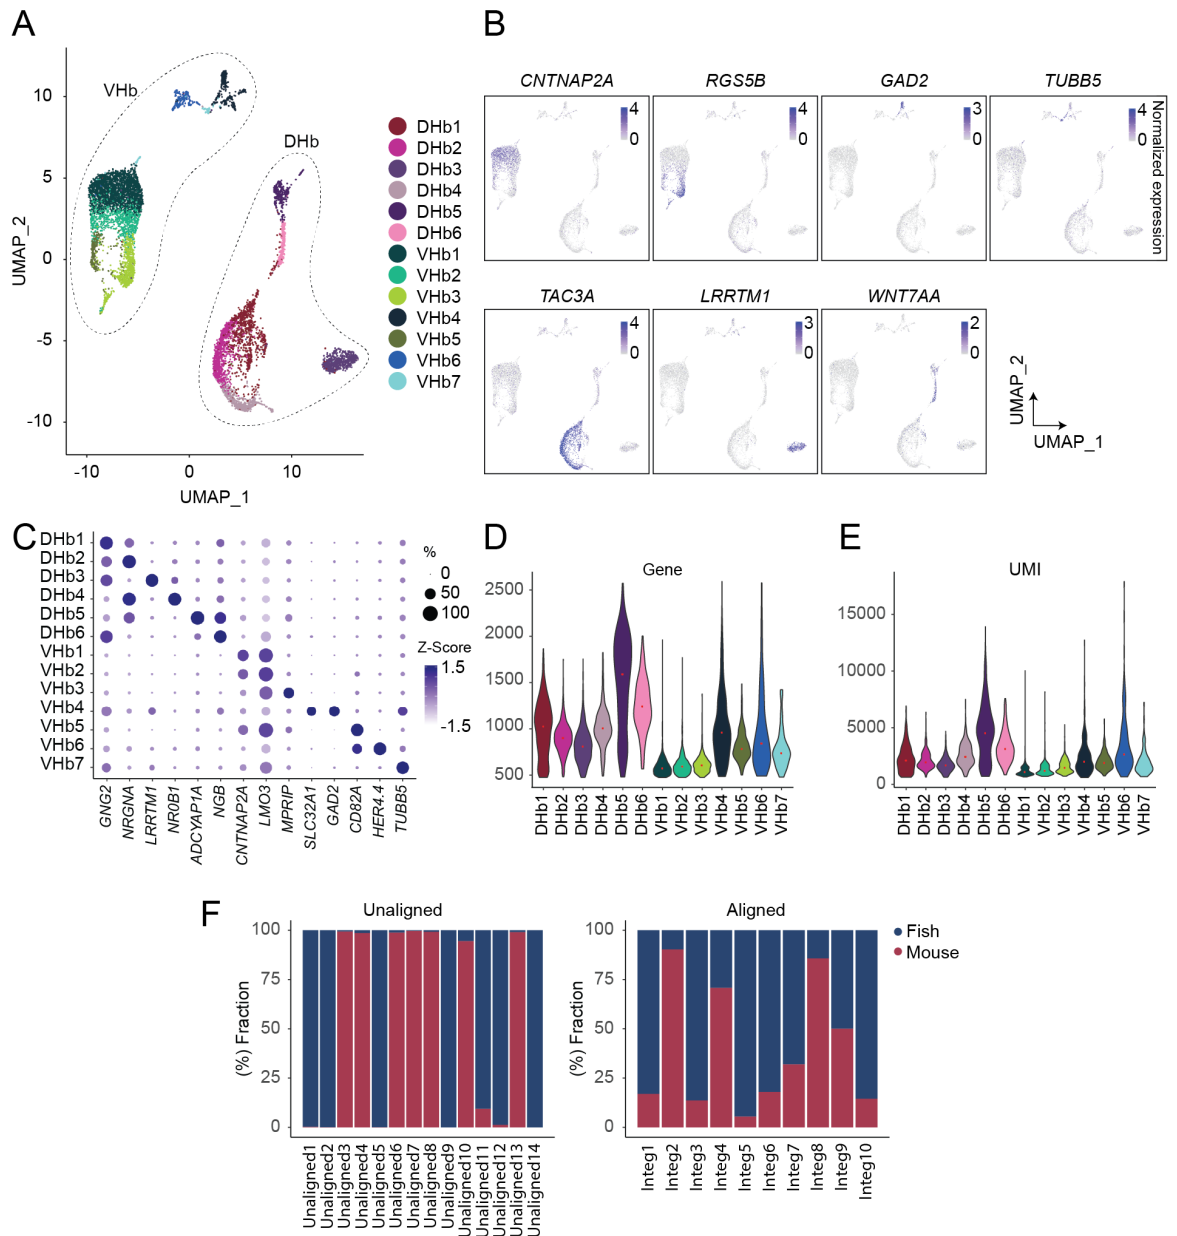

**Figure S4. Additional information for scRNAseq analysis on adult zebrafish habenula neurons, related to Figure 4. A.** UMAP visualization of neuronal clusters of zebrafish habenula. **B.** Expression plots illustrating expression levels of marker genes for dorsal or ventral parts of zebrafish habenula. **C.** Dot plot illustrating scaled expression levels (color) and the proportions of expressing cells (dot size) of discriminative marker genes for clusters. **D and E.** Violin plot showing the gene (**D**) and UMI (**E**) distributions in each cell type. **F.** Proportion of zebrafish or mouse cells in each unaligned (Left) and aligned (Right) cluster.

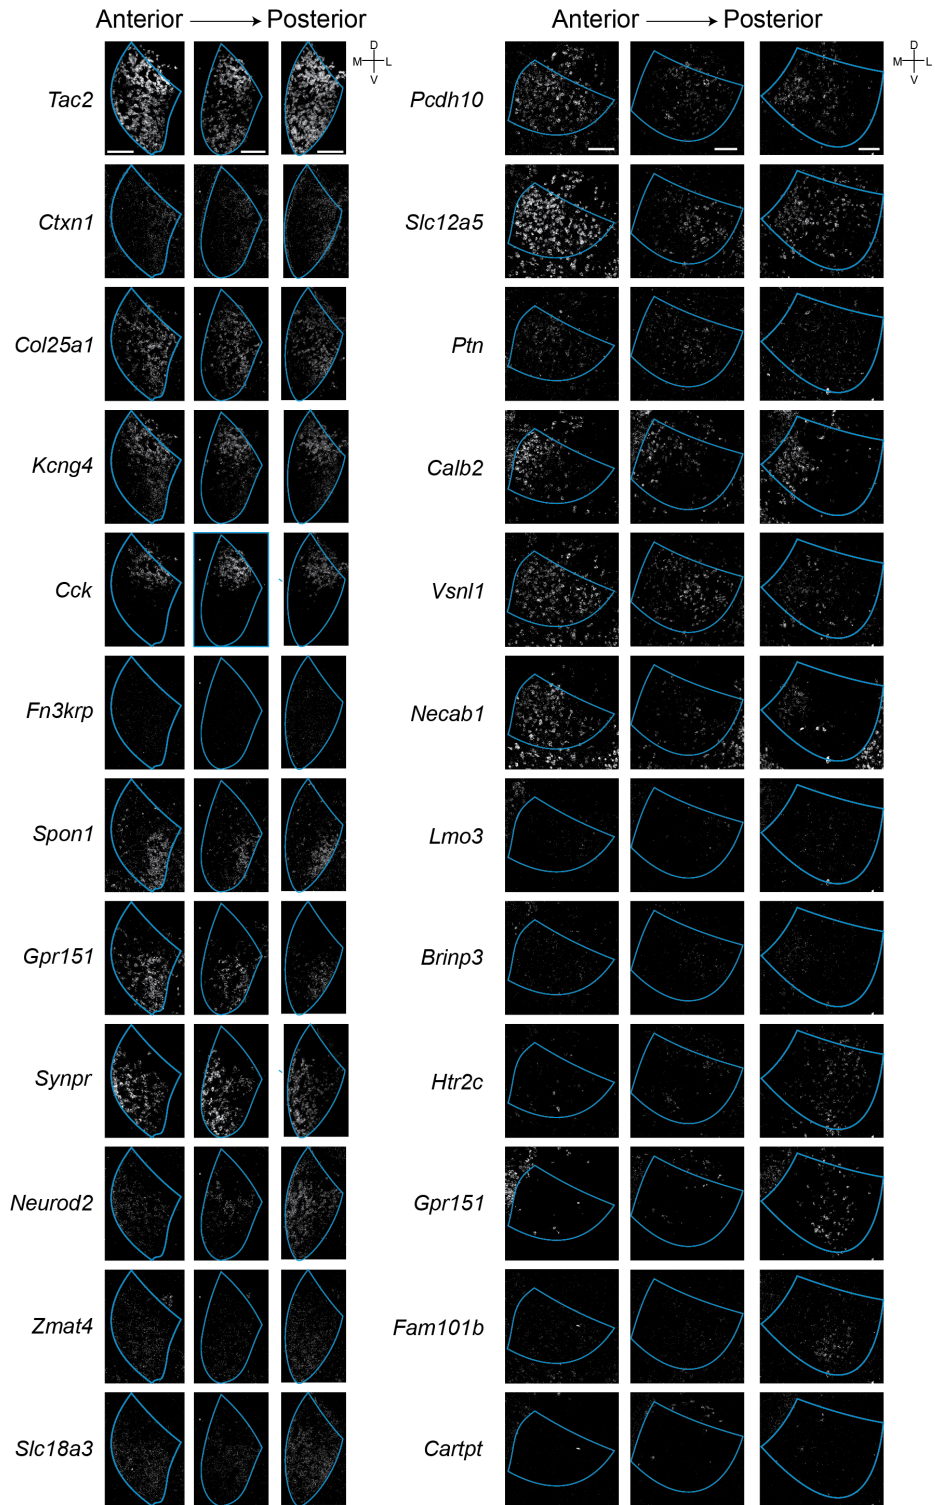

**Figure S5. Additional information for HiPlex experiments, related to Figure 5.** Representative FISH images of all 12 detected genes for the MHb (Left) and the LHb (Right). Scale bar: 100  $\mu$ m.



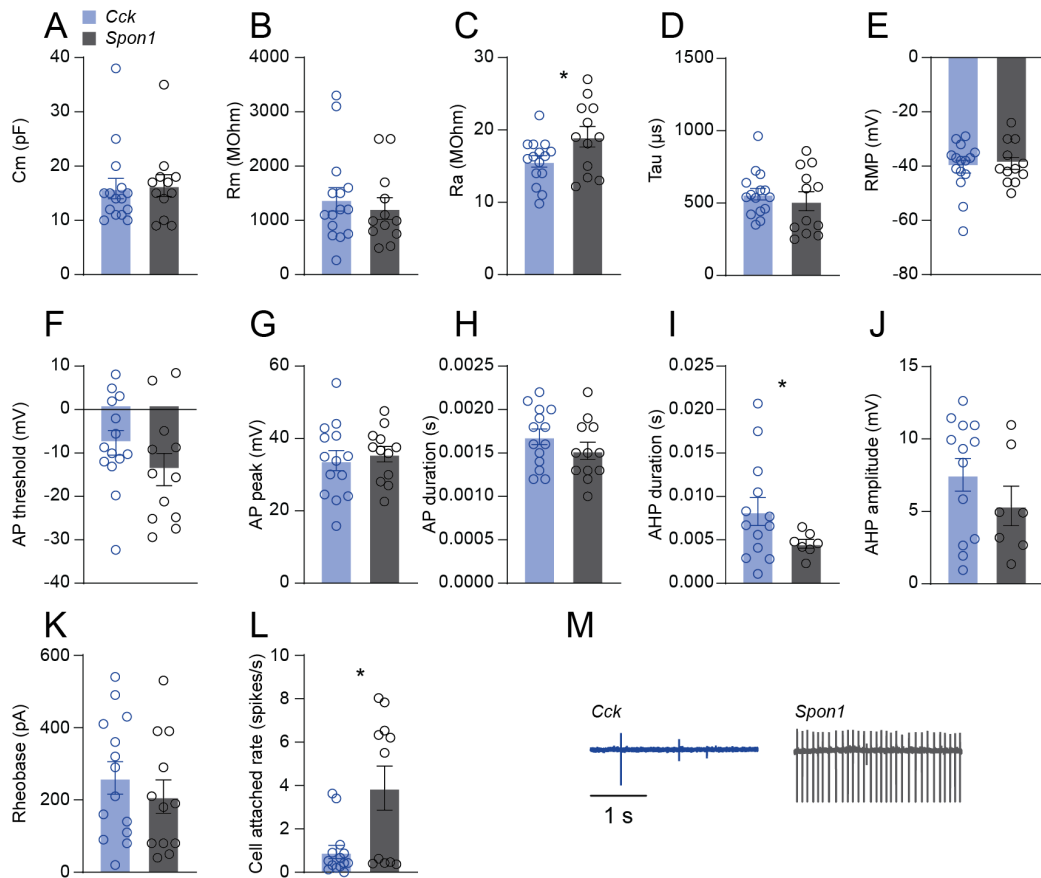

**Figure S6. Additional information for slice physiology experiments, related to Figure 6. A.** Membrane capacitance (Cm). t-test:  $t(25)=0.20$ ,  $p=0.84$ . **B.** Membrane resistance (Rm). t-test:  $t(25)=0.56$ ,  $p=0.58$ . **C.** Access Resistance (Ra). t-test:  $t(25)=2.19$ ,  $p=0.04$ . **D.** Tau. t-test:  $t(25)=0.66$ ,  $p=0.51$ . **E.** Resting membrane potential (RMP). t-test:  $t(25)=0.36$ ,  $p=0.72$ . **F.** Action potential (AP) threshold. t-test:  $t(24)=1.35$ ,  $p=0.19$ . **G.** Action potential (AP) peak. t-test:  $t(24)=0.49$ ,  $p=0.63$ . **H.** Action potential (AP) duration. t-test:  $t(24)=1.21$ ,  $p=0.24$ . **I.** Afterhyperpolarization (AHP) duration. t-test with Welch's correction for unequal variance:  $t(14.21)=2.18$ ,  $p=0.046$ . **J.** Afterhyperpolarization (AHP) amplitude. t-test:  $t(18)=1.16$ ,  $p=0.26$ . **K.** Rheobase. t-test:  $t(24)=0.80$ ,  $p=0.43$ . **L.** Firing rate recorded in cell-attached mode: t-test with Welch's correction for unequal variance:  $t(11.84)=2.79$ ,  $p=0.016$ . **M.** Example cell-attached recordings from *Cck*- (Left) and *Spon1*- (Right) expressing cells.

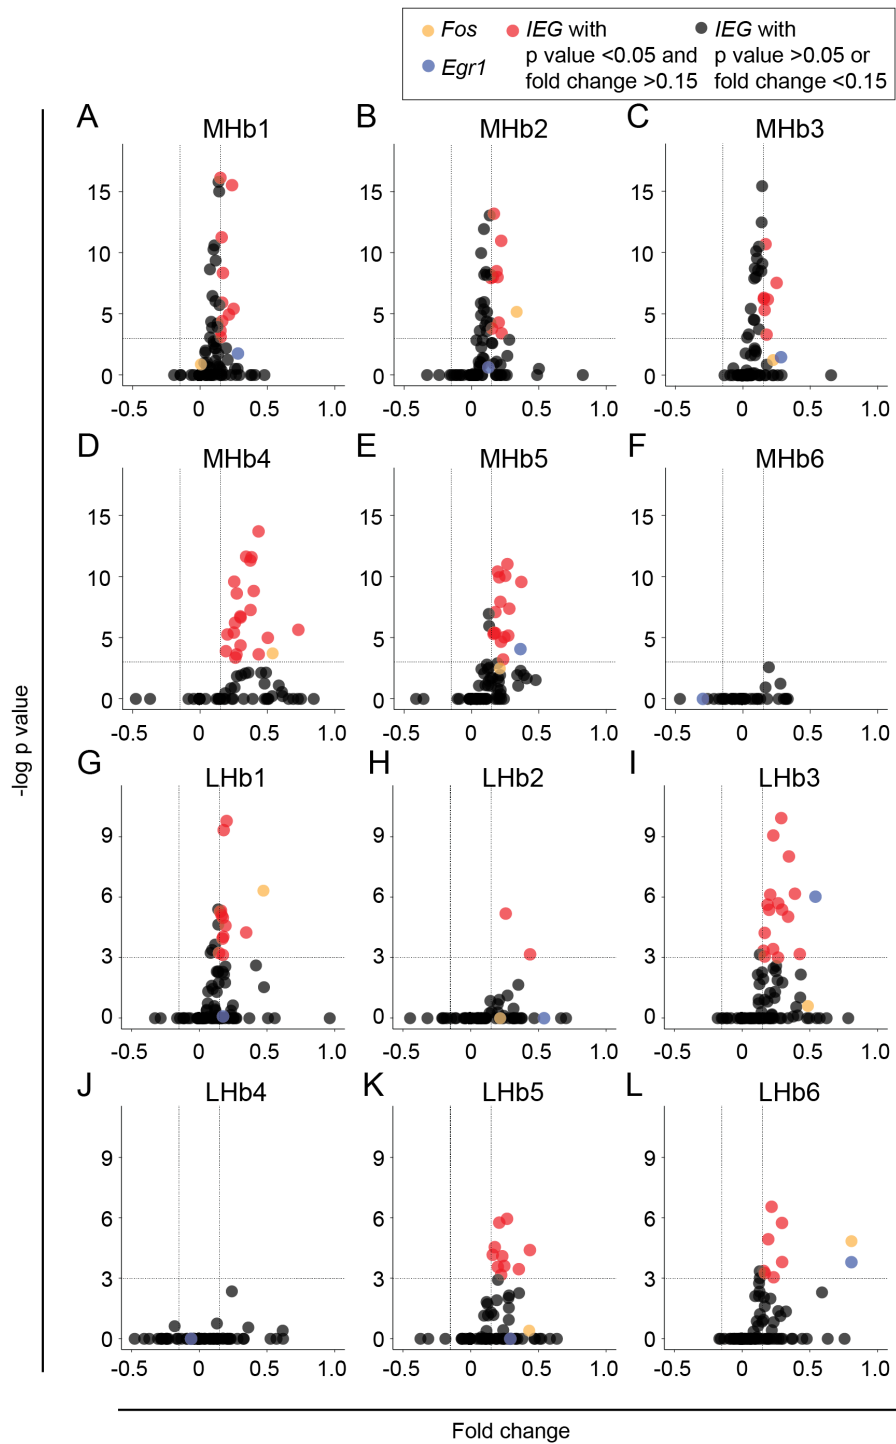

**Figure S7. Additional information for IEG analysis, related to Figure 7.** Scatter plots showing fold change (x-axis) and  $-\log p$  value (y-axis) of 139 IEGs comparing foot shock and home cage groups at each transcriptional cluster.

| Gene             | Fig    | ABA experiment number (mouse, adult, ISH, coronal, Passed QC) |                                                                                                                               |
|------------------|--------|---------------------------------------------------------------|-------------------------------------------------------------------------------------------------------------------------------|
| <i>Tac2</i>      | 2D, 2E | 72339556                                                      | <a href="http://mouse.brain-map.org/experiment/show/72339556">http://mouse.brain-map.org/experiment/show/72339556</a>         |
| <i>Pcdh10</i>    | 2D, 2E | NA                                                            | NA                                                                                                                            |
| <i>Slc17a6</i>   | 2D, 2E | 73818754                                                      | <a href="https://mouse.brain-map.org/experiment/show?id=73818754">https://mouse.brain-map.org/experiment/show?id=73818754</a> |
| <i>Slc17a7</i>   | 2D, 2E | 70436317                                                      | <a href="https://mouse.brain-map.org/experiment/show?id=70436317">https://mouse.brain-map.org/experiment/show?id=70436317</a> |
| <i>Gad1</i>      | 2D, 2E | 479                                                           | <a href="https://mouse.brain-map.org/experiment/show?id=479">https://mouse.brain-map.org/experiment/show?id=479</a>           |
| <i>Gad2</i>      | 2D, 2E | 79591669                                                      | <a href="https://mouse.brain-map.org/experiment/show?id=79591669">https://mouse.brain-map.org/experiment/show?id=79591669</a> |
| <i>Slc32a1</i>   | 2D, 2E | 1098                                                          | <a href="https://mouse.brain-map.org/experiment/show?id=1098">https://mouse.brain-map.org/experiment/show?id=1098</a>         |
| <i>Gpr151</i>    | 2D, 2E | 74724649                                                      | <a href="https://mouse.brain-map.org/experiment/show?id=74724649">https://mouse.brain-map.org/experiment/show?id=74724649</a> |
| <i>Pou4f1</i>    | 2D, 2E | 74641304                                                      | <a href="https://mouse.brain-map.org/experiment/show?id=74641304">https://mouse.brain-map.org/experiment/show?id=74641304</a> |
| <i>Nr4a2</i>     | 2D, 2E | 732                                                           | <a href="https://mouse.brain-map.org/experiment/show?id=732">https://mouse.brain-map.org/experiment/show?id=732</a>           |
| <i>Slc18a3</i>   | 2D, 2E | 73521822                                                      | <a href="https://mouse.brain-map.org/experiment/show?id=73521822">https://mouse.brain-map.org/experiment/show?id=73521822</a> |
| <i>Chat</i>      | 2D, 2E | 252                                                           | <a href="https://mouse.brain-map.org/experiment/show?id=252">https://mouse.brain-map.org/experiment/show?id=252</a>           |
| <i>Tac1</i>      | 2D, 2E | 1038                                                          | <a href="https://mouse.brain-map.org/experiment/show?id=1038">https://mouse.brain-map.org/experiment/show?id=1038</a>         |
| <i>Calb1</i>     | 2D, 2E | 71717640                                                      | <a href="https://mouse.brain-map.org/experiment/show?id=71717640">https://mouse.brain-map.org/experiment/show?id=71717640</a> |
| <i>Rapgef4</i>   | 2D, 2E | 74749895                                                      | <a href="https://mouse.brain-map.org/experiment/show?id=74749895">https://mouse.brain-map.org/experiment/show?id=74749895</a> |
| <i>Kcng4</i>     | 2D, 2E | 72081560                                                      | <a href="https://mouse.brain-map.org/experiment/show?id=72081560">https://mouse.brain-map.org/experiment/show?id=72081560</a> |
| <i>Calb2</i>     | 2D, 2E | 79556662                                                      | <a href="https://mouse.brain-map.org/experiment/show?id=79556662">https://mouse.brain-map.org/experiment/show?id=79556662</a> |
| <i>Lynx1</i>     | 2D, 2E | 655                                                           | <a href="https://mouse.brain-map.org/experiment/show?id=655">https://mouse.brain-map.org/experiment/show?id=655</a>           |
| <i>Neurod2</i>   | 2D, 2E | 75651126                                                      | <a href="https://mouse.brain-map.org/experiment/show?id=75651126">https://mouse.brain-map.org/experiment/show?id=75651126</a> |
| <i>Plcx2</i>     | 2D, 2E | 79591579                                                      | <a href="https://mouse.brain-map.org/experiment/show?id=79591579">https://mouse.brain-map.org/experiment/show?id=79591579</a> |
| <i>Syndig1</i>   | 2D, 2E | NA                                                            | NA                                                                                                                            |
| <i>Slc5a7</i>    | 2D, 2E | 73929608                                                      | <a href="https://mouse.brain-map.org/experiment/show?id=73929608">https://mouse.brain-map.org/experiment/show?id=73929608</a> |
| <i>Ntm</i>       | 2D, 2E | 573                                                           | <a href="https://mouse.brain-map.org/experiment/show?id=573">https://mouse.brain-map.org/experiment/show?id=573</a>           |
| <i>Fn3krp</i>    | 2D, 2E | 74819239                                                      | <a href="https://mouse.brain-map.org/experiment/show?id=74819239">https://mouse.brain-map.org/experiment/show?id=74819239</a> |
| <i>Abhd2</i>     | 2D, 2E | NA                                                            | NA                                                                                                                            |
| <i>Hsf2</i>      | 2D, 2E | NA                                                            | NA                                                                                                                            |
| <i>Cck</i>       | 2D, 2E | 77869074                                                      | <a href="https://mouse.brain-map.org/experiment/show?id=77869074">https://mouse.brain-map.org/experiment/show?id=77869074</a> |
| <i>Adcyap1</i>   | 2D, 2E | 74511882                                                      | <a href="https://mouse.brain-map.org/experiment/show?id=74511882">https://mouse.brain-map.org/experiment/show?id=74511882</a> |
| <i>Rasd2</i>     | 2D, 2E | 73636089                                                      | <a href="http://mouse.brain-map.org/experiment/show/73636089">http://mouse.brain-map.org/experiment/show/73636089</a>         |
| <i>Wif1</i>      | 2D, 2E | 1111                                                          | <a href="https://mouse.brain-map.org/experiment/show?id=1111">https://mouse.brain-map.org/experiment/show?id=1111</a>         |
| <i>Fam81a</i>    | 2D, 2E | 73732150                                                      | <a href="https://mouse.brain-map.org/experiment/show?id=73732150">https://mouse.brain-map.org/experiment/show?id=73732150</a> |
| <i>Gnb4</i>      | 2D, 2E | 74047771                                                      | <a href="https://mouse.brain-map.org/experiment/show?id=74047771">https://mouse.brain-map.org/experiment/show?id=74047771</a> |
| <i>Spon1</i>     | 2D, 2E | 71836797                                                      | <a href="https://mouse.brain-map.org/experiment/show?id=71836797">https://mouse.brain-map.org/experiment/show?id=71836797</a> |
| <i>Kcnmb4os2</i> | 2D, 2E | NA                                                            | NA                                                                                                                            |
| <i>Cytip</i>     | 2D, 2E | 1270                                                          | <a href="https://mouse.brain-map.org/experiment/show?id=1270">https://mouse.brain-map.org/experiment/show?id=1270</a>         |
| <i>Vangl1</i>    | 2D, 2E | 71670709                                                      | <a href="https://mouse.brain-map.org/experiment/show?id=71670709">https://mouse.brain-map.org/experiment/show?id=71670709</a> |
| <i>Zmat4</i>     | 2D, 2E | 71249750                                                      | <a href="https://mouse.brain-map.org/experiment/show?id=71249750">https://mouse.brain-map.org/experiment/show?id=71249750</a> |
| <i>Lmo1</i>      | 2D, 2E | 1373                                                          | <a href="https://mouse.brain-map.org/experiment/show?id=1373">https://mouse.brain-map.org/experiment/show?id=1373</a>         |
| <i>Prokr2</i>    | 2D, 2E | 74511780                                                      | <a href="https://mouse.brain-map.org/experiment/show?id=74511780">https://mouse.brain-map.org/experiment/show?id=74511780</a> |
| <i>Vav2</i>      | 2D, 2E | 74583149                                                      | <a href="https://mouse.brain-map.org/experiment/show?id=74583149">https://mouse.brain-map.org/experiment/show?id=74583149</a> |
| <i>Nhlh2</i>     | 2D, 2E | 74657929                                                      | <a href="https://mouse.brain-map.org/experiment/show?id=74657929">https://mouse.brain-map.org/experiment/show?id=74657929</a> |
| <i>Syt6</i>      | 2D, 2E | 1032                                                          | <a href="https://mouse.brain-map.org/experiment/show?id=1032">https://mouse.brain-map.org/experiment/show?id=1032</a>         |
| <i>Cacna2d1</i>  | 2D, 2E | 75042246                                                      | <a href="https://mouse.brain-map.org/experiment/show?id=75042246">https://mouse.brain-map.org/experiment/show?id=75042246</a> |
| <i>Slc6a1</i>    | 2D, 2E | 79591685                                                      | <a href="https://mouse.brain-map.org/experiment/show?id=79591685">https://mouse.brain-map.org/experiment/show?id=79591685</a> |
| <i>Lpar1</i>     | 2D, 2E | 79556595                                                      | <a href="https://mouse.brain-map.org/experiment/show?id=79556595">https://mouse.brain-map.org/experiment/show?id=79556595</a> |
| <i>Ptn</i>       | 2D, 2E | 2507                                                          | <a href="https://mouse.brain-map.org/experiment/show?id=2507">https://mouse.brain-map.org/experiment/show?id=2507</a>         |
| <i>Edil3</i>     | 2D, 2E | NA                                                            | NA                                                                                                                            |
| <i>Arpp21</i>    | 2D, 2E | 71587781                                                      | <a href="https://mouse.brain-map.org/experiment/show?id=71587781">https://mouse.brain-map.org/experiment/show?id=71587781</a> |
| <i>Pou2f2</i>    | 2D, 2E | NA                                                            | NA                                                                                                                            |
| <i>Sox1</i>      | 2D, 2E | NA                                                            | NA                                                                                                                            |
| <i>Iqsec3</i>    | 2D, 2E | 73636153                                                      | <a href="https://mouse.brain-map.org/experiment/show?id=73636153">https://mouse.brain-map.org/experiment/show?id=73636153</a> |
| <i>Kcnk2</i>     | 2D, 2E | 75147764                                                      | <a href="https://mouse.brain-map.org/experiment/show?id=75147764">https://mouse.brain-map.org/experiment/show?id=75147764</a> |
| <i>Rbfox1</i>    | 2D, 2E | NA                                                            | NA                                                                                                                            |
| <i>Lmo3</i>      | 2D, 2E | 73616037                                                      | <a href="https://mouse.brain-map.org/experiment/show?id=73616037">https://mouse.brain-map.org/experiment/show?id=73616037</a> |
| <i>Sv2c</i>      | 2D, 2E | 74357583                                                      | <a href="https://mouse.brain-map.org/experiment/show?id=74357583">https://mouse.brain-map.org/experiment/show?id=74357583</a> |
| <i>Fam101b</i>   | 2D, 2E | NA                                                            | NA                                                                                                                            |
| <i>Chrm2</i>     | 2D, 2E | 70560343                                                      | <a href="https://mouse.brain-map.org/experiment/show?id=70560343">https://mouse.brain-map.org/experiment/show?id=70560343</a> |
| <i>Cnih3</i>     | 2D, 2E | 39                                                            | <a href="https://mouse.brain-map.org/experiment/show?id=39">https://mouse.brain-map.org/experiment/show?id=39</a>             |
| <i>Maob</i>      | 2D, 2E | 71670489                                                      | <a href="https://mouse.brain-map.org/experiment/show?id=71670489">https://mouse.brain-map.org/experiment/show?id=71670489</a> |
| <i>Htr2c</i>     | 2D, 2E | 73636098                                                      | <a href="https://mouse.brain-map.org/experiment/show?id=73636098">https://mouse.brain-map.org/experiment/show?id=73636098</a> |
| <i>Kcnmb4</i>    | 2D, 2E | 72283793                                                      | <a href="https://mouse.brain-map.org/experiment/show?id=72283793">https://mouse.brain-map.org/experiment/show?id=72283793</a> |
| <i>Cartpt</i>    | 2D, 2E | 72077479                                                      | <a href="https://mouse.brain-map.org/experiment/show?id=72077479">https://mouse.brain-map.org/experiment/show?id=72077479</a> |
| <i>Foxp2</i>     | 2D, 2E | 72079884                                                      | <a href="https://mouse.brain-map.org/experiment/show?id=72079884">https://mouse.brain-map.org/experiment/show?id=72079884</a> |
| <i>Fstl1</i>     | 2D, 2E | 71016596                                                      | <a href="https://mouse.brain-map.org/experiment/show?id=71016596">https://mouse.brain-map.org/experiment/show?id=71016596</a> |

**Table S1. List of habenula marker genes reported in Allen brain atlas, related to Figure 2.**

| REAGENT or RESOURCE                                  | SOURCE | IDENTIFIER     |
|------------------------------------------------------|--------|----------------|
| RNAscope <sup>®</sup> HiPlex Probe- Mm-Zmat4-T3      | ACDBio | Cat#578011-T3  |
| RNAscope <sup>®</sup> HiPlex Probe- Mm-Kcng4-T5      | ACDBio | Cat#316931-T5  |
| RNAscope <sup>®</sup> HiPlex Probe- Mm-Fn3krp-T6     | ACDBio | Cat#583881-T6  |
| RNAscope <sup>®</sup> HiPlex Probe- Mm-Ctxn1-T7      | ACDBio | Cat#467041-T7  |
| RNAscope <sup>®</sup> HiPlex Probe- Mm-Tac2-T8       | ACDBio | Cat#446391-T8  |
| RNAscope <sup>®</sup> HiPlex Probe- Mm-Col25a1-T9    | ACDBio | Cat#538511-T9  |
| RNAscope <sup>®</sup> HiPlex Probe- Mm-Cck-T10       | ACDBio | Cat#402271-T10 |
| RNAscope <sup>®</sup> HiPlex Probe- Mm-Gpr151-T11    | ACDBio | Cat#317321-T11 |
| RNAscope <sup>®</sup> HiPlex Probe- Mm-Synpr-T12     | ACDBio | Cat#500961-T12 |
| RNAscope <sup>®</sup> HiPlex Probe- Mm-Necab1-T1     | ACDBio | Cat#428541-T1  |
| RNAscope <sup>®</sup> HiPlex Probe- Mm-Rflnb-T2      | ACDBio | Cat#524091-T2  |
| RNAscope <sup>®</sup> HiPlex Probe- Mm-Cartpt-T3     | ACDBio | Cat#432001-T3  |
| RNAscope <sup>®</sup> HiPlex Probe- Mm-Vsn1-T5       | ACDBio | Cat#583871-T5  |
| RNAscope <sup>®</sup> HiPlex Probe- Mm-Lmo3-T6       | ACDBio | Cat#497631-T6  |
| RNAscope <sup>®</sup> HiPlex Probe- Mm-Brinp3-T7     | ACDBio | Cat#583861-T7  |
| RNAscope <sup>®</sup> HiPlex Probe- Mm-SLC12A5-T8    | ACDBio | Cat#311901-T8  |
| RNAscope <sup>®</sup> HiPlex Probe- Mm-Pcdh10-T9     | ACDBio | Cat#477781-T9  |
| RNAscope <sup>®</sup> HiPlex Probe- Mm-Ptn-T10       | ACDBio | Cat#486381-T10 |
| RNAscope <sup>®</sup> Probe- Mm-Slc18a3-C3           | ACDBio | Cat#448771-C3  |
| RNAscope <sup>®</sup> Probe- Mm-Htr2c                | ACDBio | Cat#401001     |
| RNAscope <sup>®</sup> Probe- Mm-Calb2-C3             | ACDBio | Cat#313641-C3  |
| RNAscope <sup>®</sup> HiPlex Probe- Mm-Neurod2-O1-T1 | ACDBio | Cat#537171-T1  |
| RNAscope <sup>®</sup> HiPlex Probe- Mm-Spon1-T2      | ACDBio | Cat#492671-T2  |
| RNAscope <sup>®</sup> Probe- Mm-Fos                  | ACDBio | Cat#316921     |
| RNAscope <sup>®</sup> Probe- Mm-Fos-C2               | ACDBio | Cat#316921-C2  |
| RNAscope <sup>®</sup> Probe- Mm-Fos-C3               | ACDBio | Cat#316921-C3  |
| RNAscope <sup>®</sup> Probe- Mm-Cck                  | ACDBio | Cat#402271     |
| RNAscope <sup>®</sup> Probe- Mm-Spon1-C3             | ACDBio | Cat#492671-C3  |
| RNAscope <sup>®</sup> Probe- Mm-Lmo3-C3              | ACDBio | Cat#497631-C3  |
| RNAscope <sup>®</sup> Probe- Mm-Sv2c                 | ACDBio | Cat#545001-C2  |

**Table S2. RNAscope<sup>®</sup> probe information, Related to KEY RESOURCES TABLE.**
